# Supplementary material for: Long-Term HBsAg Titer Kinetics with Entecavir/Tenofovir: Implications for Predicting Functional Cure and Low Levels
Source: MDPI journal article supplement (doi:10.3390/diagnostics14050495), 2024-02-25
Supplement: s1 [file s1]

## Supplementary Materials

### Table of contents

|                              |   |
|------------------------------|---|
| Supplementary Figure S1..... | 2 |
| Supplementary Figure S2..... | 3 |
| Supplementary Figure S3..... | 4 |
| Supplementary Table S1.....  | 5 |
| Supplementary Table S2.....  | 7 |

**Supplementary Figure S1.** Flow chart of the study.

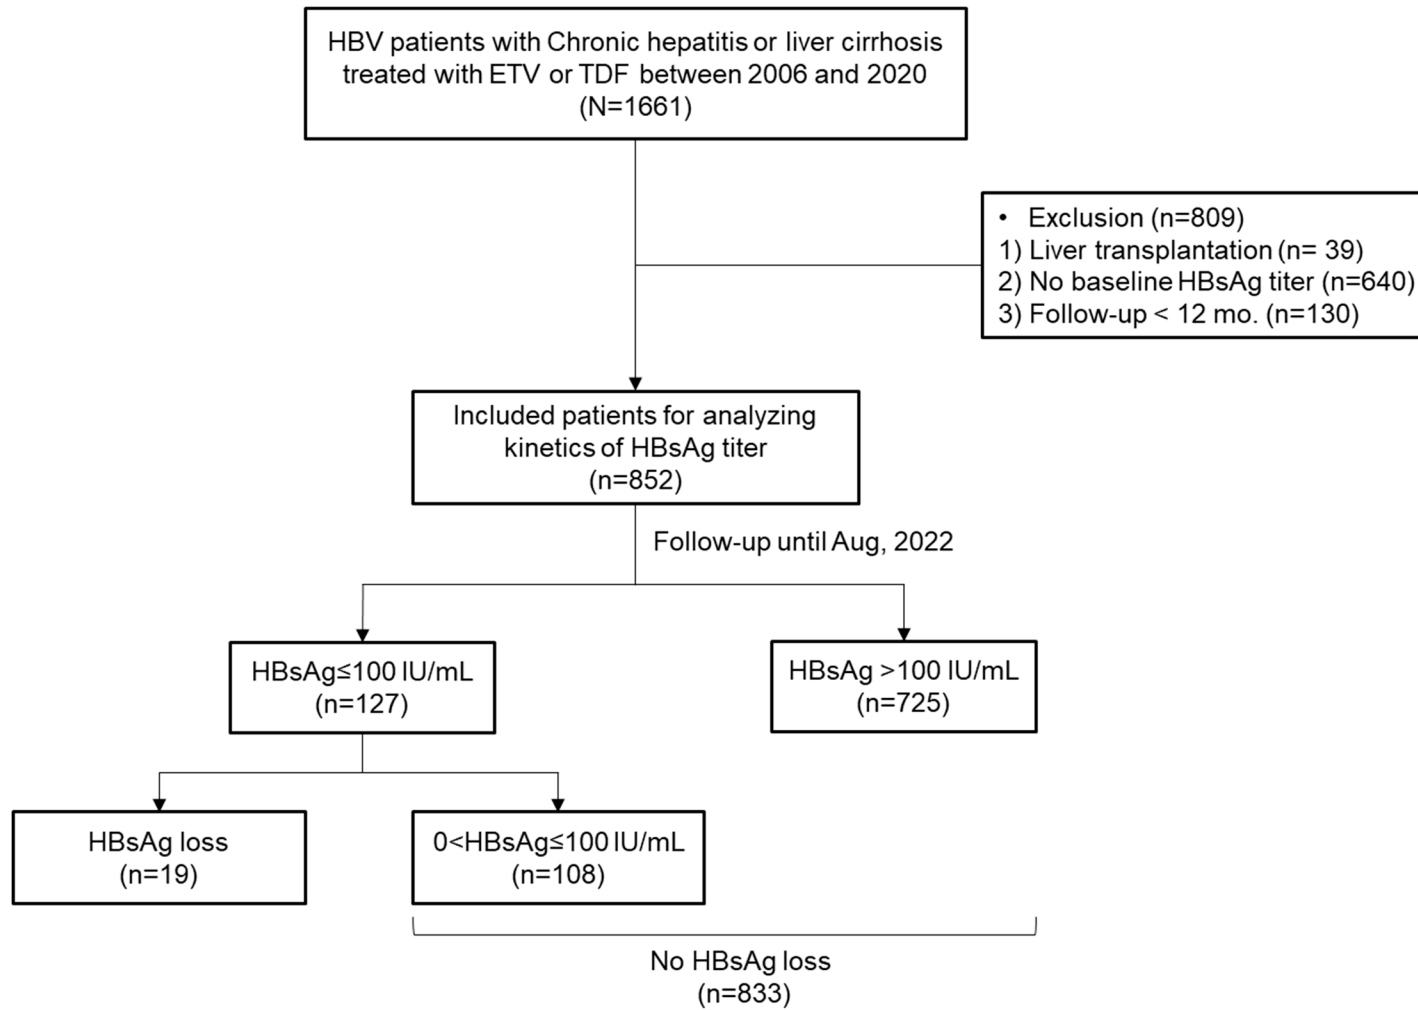

**Supplementary Figure S2.** Serial changes in the HBsAg level according to the achievement of (A) functional cure and (B) Low HBsAg level after nucleos(t)ide analogue therapy.

(A)

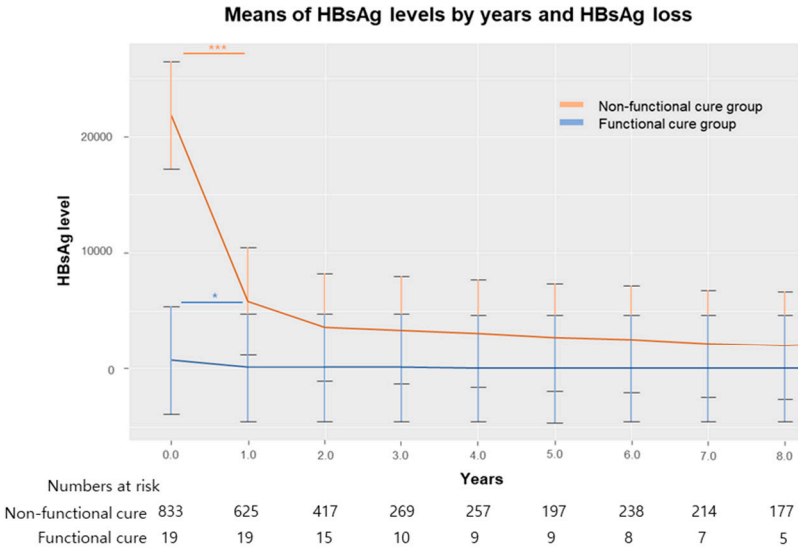

(B)

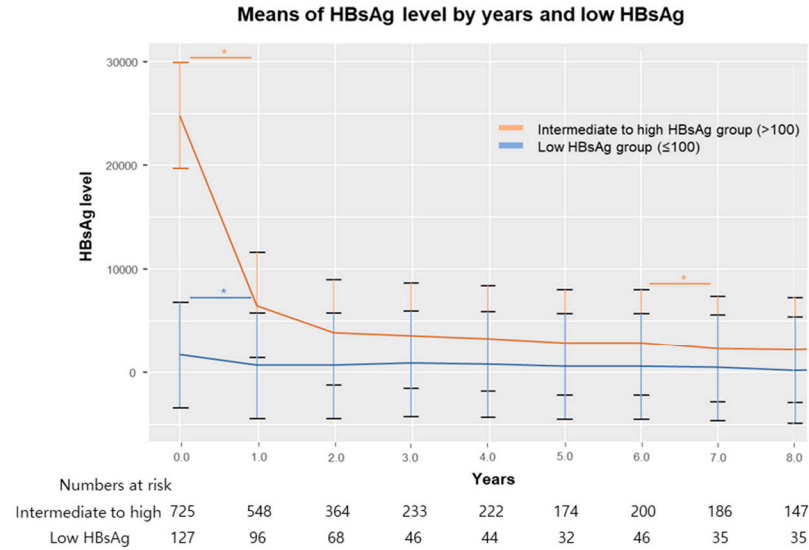

**Supplementary Figure S3.** Kaplan-Meier curve for (A) functional cure and (B) low HBsAg level according to type of nucleos(t)ide analogue therapy.

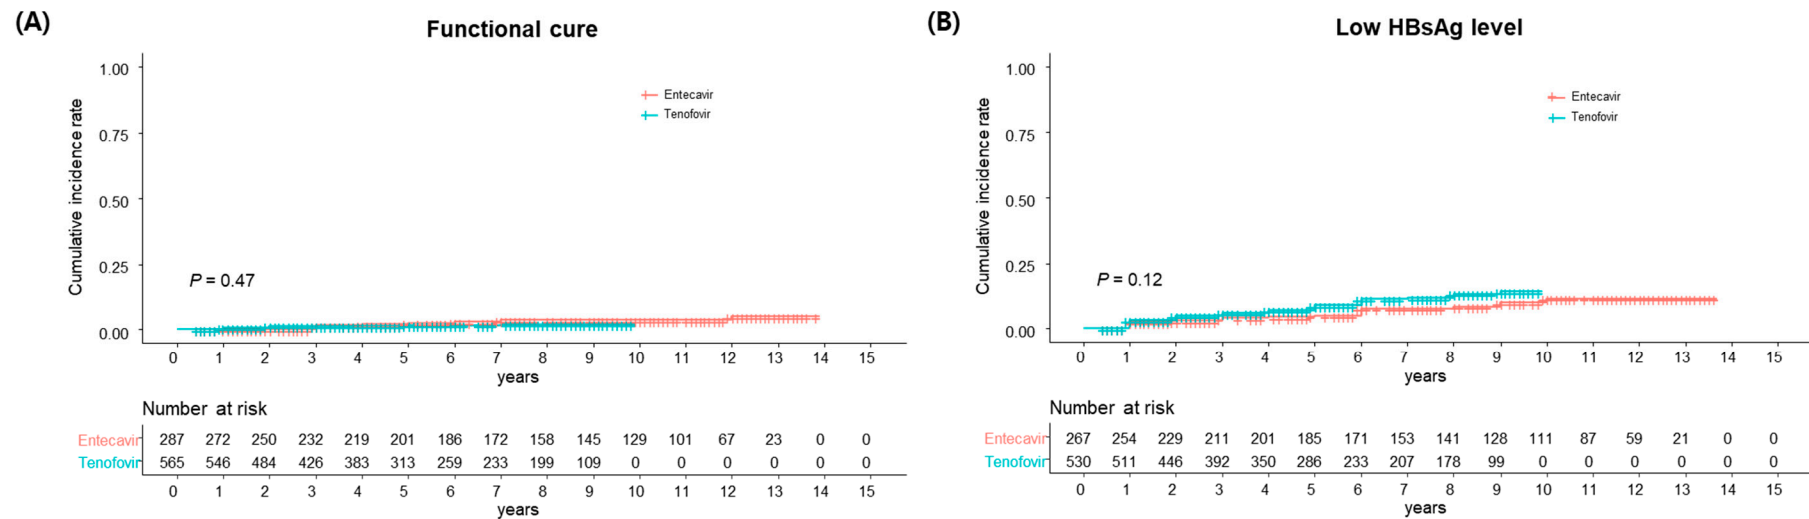

**Supplementary Table S1.** Baseline characteristics and clinical outcomes of patients achieving HbsAgloss.

| No | Age | Sex    | Antiviral | HBeAg      | Disease status | AST | ALT  | T.bil | Alb | Platelet | HBV DNA | Baseline titer | LowHBs _yr | HBsAgloss -Yr | HCC | Progression | Regression |
|----|-----|--------|-----------|------------|----------------|-----|------|-------|-----|----------|---------|----------------|------------|---------------|-----|-------------|------------|
| 1  | 48  | Female | Entecavir | (+) 277.0  | Hepatitis      | 78  | 73   | 0.6   | 3.8 | 146      | 6.31    | 42.34          | 0.0        | 3.0           | No  | No          | No         |
| 2  | 48  | Female | Entecavir | (+) 1245.8 | Hepatitis      | 128 | 170  | 1     | 3.9 | 142      | 6.58    | 248.29         | 1.0        | 3.0           | No  | No          | No         |
| 3  | 61  | Female | Entecavir | (+) 1519.4 | Hepatitis      | 44  | 78   | 2.5   | 4.3 | 218      | 5.23    | 72.29          | 0.0        | 3.0           | No  | No          | No         |
| 4  | 46  | Male   | Entecavir | (-)        | Hepatitis      | 253 | 407  | 0.9   | 3.8 | 184      | 5.61    | 1147           | 2.0        | 4.0           | No  | No          | No         |
| 5  | 45  | Male   | Entecavir | (-)        | Cirrhosis      | 287 | 492  | 1.7   | 4.5 | 136      | 5.97    | 78.32          | 0.0        | 12.0          | No  | No          | No         |
| 6  | 35  | Male   | Entecavir | (+) 686.9  | Hepatitis      | 562 | 683  | 4.9   | 3.6 | 141      | 6.93    | 245            | 3.0        | 7.0           | No  | No          | No         |
| 7  | 34  | Male   | Entecavir | (-)        | Cirrhosis      | 94  | 200  | 1.2   | 4.5 | 159      | 5.68    | 47.75          | 0.0        | 6.0           | No  | No          | No         |
| 8  | 66  | Male   | Entecavir | (+)1786.2  | Hepatitis      | 57  | 62   | 1.2   | 4.3 | 168      | 8.09    | 4452.73        | 1.0        | 3.0           | No  | No          | No         |
| 9  | 60  | Male   | Entecavir | (+) 27.9   | Cirrhosis      | 95  | 153  | 0.5   | 4.3 | 142      | 6.46    | 3276           | 1.0        | 5.0           | No  | No          | Yes        |
| 10 | 51  | Female | Tenofovir | (-)        | Cirrhosis      | 57  | 89   | 0.8   | 4.7 | 94       | 3.98    | 3.64           | 0.0        | 7.0           | No  | No          | No         |
| 11 | 59  | Male   | Tenofovir | (+) 27.9   | Cirrhosis      | 95  | 153  | 0.5   | 4.3 | 108      | 6.44    | 3276.61        | 1.0        | 5.0           | No  | No          | Yes        |
| 12 | 65  | Female | Tenofovir | (+) 1729.6 | Hepatitis      | 42  | 52   | 1.3   | 4   | 222      | 8.04    | 10.8           | 0.0        | 2.0           | No  | Yes         | No         |
| 13 | 69  | Male   | Tenofovir | (-)        | Hepatitis      | 24  | 21   | 0.5   | 4.5 | 226      | 7.14    | 71.72          | 0.0        | 1.0           | No  | No          | No         |
| 14 | 51  | Male   | Tenofovir | (-)        | Hepatitis      | 946 | 1616 | 2.6   | 4   | 158      | 6.36    | 46.85          | 0.0        | 2.0           | No  | No          | No         |
| 15 | 65  | Female | Tenofovir | (-)        | Cirrhosis      | 23  | 13   | 0.7   | 4.3 | 68       | 2.56    | 0.02           | 0.0        | 2.0           | No  | No          | No         |

|    |    |      |                    |           |      |      |      |     |     |      |        |     |     |    |    |     |
|----|----|------|--------------------|-----------|------|------|------|-----|-----|------|--------|-----|-----|----|----|-----|
| 16 | 31 | Male | Tenofovir (+) 19.3 | Hepatitis | 2201 | 1987 | 9.9  | 4.7 | 215 | 3.63 | 218.55 | 1.0 | 1.0 | No | No | No  |
| 17 | 55 | Male | Tenofovir (-)      | Cirrhosis | 1768 | 3649 | 11.3 | 3.9 | 199 | 6.02 | 2.35   | 0.0 | 1.0 | No | No | Yes |
| 18 | 60 | Male | Tenofovir (+) 2.9  | Hepatitis | 40   | 40   | 1.2  | 4.5 | 165 | 7.14 | 35.09  | 0.0 | 2.0 | No | No | No  |
| 19 | 67 | Male | Tenofovir (-)      | Cirrhosis | 36   | 59   | 1.4  | 4.9 | 160 | 1.67 | 9.28   | 0.0 | 1.0 | No | No | No  |

---

**Supplementary Table S2.** Univariate and multivariate Cox regression analysis for functional cure and low HBsAg level in 5-year landmark analysis.

| Functional cure |                     |                     |         |                        |                     |         | Low HBsAg level (<2log IU/mL) |                     |                     |         |                        |                     |         |
|-----------------|---------------------|---------------------|---------|------------------------|---------------------|---------|-------------------------------|---------------------|---------------------|---------|------------------------|---------------------|---------|
| Variables       | Univariate analysis |                     |         | Multivariable analysis |                     |         | Variables                     | Univariate analysis |                     |         | Multivariable analysis |                     |         |
|                 | HR <sup>I</sup>     | 95% CI <sup>I</sup> | P-value | HR <sup>I</sup>        | 95% CI <sup>I</sup> | P-value |                               | HR <sup>I</sup>     | 95% CI <sup>I</sup> | P-value | HR <sup>I</sup>        | 95% CI <sup>I</sup> | P-value |
| Age             | 1.06                | 1.01, 1.11          | 0.024   | 1.06                   | 1.01, 1.12          | 0.023   | Age                           | 1.03                | 1.01, 1.06          | 0.013   | 1.01                   | 0.98, 1.04          | 0.50    |
| Male            | 1.37                | 0.47, 4.01          | 0.6     |                        |                     |         | Male                          | 2.04                | 1.09, 3.83          | 0.027   | 1.85                   | 1.00, 3.40          | 0.048   |
| HBeAg (+)       | 1.01                | 0.36, 2.83          | >0.9    |                        |                     |         | HBeAg (+)                     | 0.57                | 0.33, 0.98          | 0.043   | 0.88                   | 0.50, 1.54          | 0.60    |
| HBVDNA          | 1.00                | 1.00, 1.00          | 0.3     |                        |                     |         | HBVDNA                        | 1.00                | 1.00, 1.00          | 0.040   | 1.00                   | 1.00, 1.00          | 0.10    |
| Alb             | 3.51                | 1.02, 12.2          | 0.047   | 6.61                   | 1.31, 33.4          | 0.022   | Alb                           | 0.82                | 0.53, 1.26          | 0.40    | 0.66                   | 0.41, 1.07          | 0.095   |
| Plt             | 1.00                | 1.00, 1.01          | 0.4     |                        |                     |         | Plt                           | 1.00                | 1.00, 1.00          | 0.8     |                        |                     |         |
| AST             | 1.00                | 1.00, 1.00          | 0.001   | 1.00                   | 1.00, 1.00          | 0.4     | AST                           | 1.00                | 1.00, 1.00          | 0.060   | 1.00                   | 1.00, 1.00          | >0.9    |
| ALT             | 1.00                | 1.00, 1.00          | <0.001  | 1.00                   | 1.00, 1.00          | 0.2     | ALT                           | 1.00                | 1.00, 1.00          | 0.13    | 1.00                   | 1.00, 1.00          | 0.30    |
| Tbil            | 1.06                | 0.96, 1.16          | 0.3     |                        |                     |         | Tbil                          | 1.05                | 0.99, 1.11          | 0.10    | 0.99                   | 0.87, 1.11          | 0.80    |
| INR             | 0.21                | 0.01, 6.72          | 0.4     |                        |                     |         | INR                           | 1.16                | 0.70, 1.92          | 0.60    |                        |                     |         |
| Cr              | 1.04                | 0.51, 2.09          | >0.9    |                        |                     |         | Cr                            | 0.95                | 0.57, 1.56          | 0.80    |                        |                     |         |

|                                                    |         |            |        |      |            |        |  |                                                     |         |            |        |      |            |        |
|----------------------------------------------------|---------|------------|--------|------|------------|--------|--|-----------------------------------------------------|---------|------------|--------|------|------------|--------|
| <b>MELD</b>                                        | 1.03    | 0.95, 1.13 | 0.4    |      |            |        |  | <b>MELD</b>                                         | 1.03    | 0.99, 1.08 | 0.20   | 0.98 | 0.88, 1.10 | 0.80   |
| <b>Antiviral</b>                                   | 0.81    | 0.28, 1.61 | 0.7    |      |            |        |  | <b>Antiviral</b>                                    | 1.73    | 0.91, 3.31 | 0.10   | 1.11 | 0.62, 1.96 | 0.70   |
| <b>Cirrhosis</b>                                   | 0.55    | 0.19, 1.61 | 0.3    |      |            |        |  | <b>Cirrhosis</b>                                    | 0.93    | 0.54, 1.62 | 0.80   |      |            |        |
| <b>HBsAg<math>\leq 10^3</math><br/>at baseline</b> | 11.1    | 3.54, 34.9 | <0.001 | 10.3 | 3.09, 34.6 | <0.001 |  | <b>HBsAg<math>\leq 10^3</math><br/>at baseline*</b> | 7.20    | 4.15, 12.5 | <0.001 | 6.31 | 3.66, 10.9 | <0.001 |
| <b>HBsAg<br/>reduction<br/>1yr</b>                 | at 2.40 | 0.68, 8.50 | 0.20   | 2.96 | 0.79, 11.1 | 0.11   |  | <b>HBsAg<br/>reduction<br/>1yr</b>                  | at 2.79 | 1.30, 5.97 | 0.008  | 2.79 | 1.52, 5.14 | <0.001 |

<sup>/</sup> HR = Hazard Ratio, CI = Confidence Interval, \* HBsAg $\leq 100$  IU/mL at baseline were excluded
